# Supplementary material
Source: PubMed Central journal article supplement (PMC9621686)
Supplement: NIHMS1843238-supplement-Supplemental_Material.pdf [file NIHMS1843238-supplement-Supplemental_Material.pdf]

## Supporting Information

### **Total Heterologous Biosynthesis of Fungal Natural Products in *Aspergillus nidulans***

This review is dedicated to Professor Yueh-Hsiung Kuo on the occasion of his 80<sup>th</sup> birthday.

Yi-Ming Chiang,<sup>†, ‡,\*</sup> Tzu-Shyang Lin,<sup>†</sup> and Clay C.C. Wang,<sup>†, §,\*</sup>

<sup>†</sup>Department of Pharmacology and Pharmaceutical Sciences, School of Pharmacy, University of Southern California, Los Angeles, California 90089, USA

<sup>‡</sup>Department of Pharmacy, Chia Nan University of Pharmacy and Science, Tainan 71710, Taiwan

<sup>§</sup>Department of Chemistry, Dornsife College of Letters, Arts, and Sciences, University of Southern California, Los Angeles, California 90089, USA

Present address for Y.-M Chiang: Hexagon Bio, Inc. Menlo Park, California 94025, USA

\*Corresponding authors. [ymchiang@mail.cnu.edu.tw](mailto:ymchiang@mail.cnu.edu.tw) (Y.-M. Chiang) and [clayw@usc.edu](mailto:clayw@usc.edu) (C. C. C. Wang)

## Table of Contents

|                                                                                                                       |     |
|-----------------------------------------------------------------------------------------------------------------------|-----|
| <b>Figure S1.</b> Selection principle of the auxotrophic markers <i>pyrG</i> , <i>riboB</i> , and <i>pyroA</i> .      | S3  |
| <b>Figure S2.</b> <i>AMA1</i> -based episomal expression vectors.                                                     | S4  |
| <b>Table S1.</b> Vectors used for <i>cgh</i> expression and their corresponding chemical products.                    | S5  |
| <b>Table S2.</b> Vectors used for <i>vir</i> expression and their corresponding chemical products.                    | S6  |
| <b>Table S3.</b> Vectors used for <i>dcs</i> expression and their corresponding chemical products.                    | S7  |
| <b>Table S4A.</b> Vectors used for <i>hql</i> expression and their corresponding chemical products.                   | S8  |
| <b>Table S4B.</b> Feeding of different substrates to the HqlC – F expression strain and the products identified.      | S8  |
| <b>Table S5.</b> Vectors used for <i>frz</i> expression and their corresponding chemical products.                    | S9  |
| <b>Table S6.</b> Vectors used for <i>qlt</i> expression and their corresponding chemical products.                    | S10 |
| <b>Table S7.</b> Vectors used for <i>pvh</i> expression and their corresponding chemical products.                    | S11 |
| <b>Table S8.</b> Vectors used for <i>lep</i> expression and their corresponding chemical products.                    | S12 |
| <b>Table S9.</b> Vectors used for <i>icc</i> expression and their corresponding chemical products.                    | S13 |
| <b>Table S10.</b> Vectors used for <i>har</i> expression and their corresponding chemical products.                   | S14 |
| <b>Table S11.</b> Vectors used for <i>pfp</i> expression and their corresponding chemical products.                   | S15 |
| <b>Table S12.</b> Vectors used for <i>fub</i> expression and their corresponding chemical products.                   | S16 |
| <b>Table S13.</b> Vectors used for <i>thm</i> expression and their corresponding chemical products.                   | S17 |
| <b>Table S14.</b> Vectors used for <i>cm3</i> expression and their corresponding chemical products.                   | S18 |
| <b>Table S15.</b> Vectors used for <i>Pgmpa</i> expression and their corresponding chemical products.                 | S19 |
| <b>Table S16A.</b> Vectors used for <i>flv</i> expression and their corresponding chemical products.                  | S20 |
| <b>Table S16B.</b> Feeding of different substrates to the various Flv expression strains and the products identified. | S20 |
| <b>Table S17.</b> Vectors used for <i>elc</i> expression and their corresponding chemical products.                   | S21 |
| <b>Table S18.</b> Vectors used for <i>vdt</i> expression and their corresponding chemical products.                   | S22 |
| <b>Table S19.</b> Vectors used for <i>sth</i> expression and their corresponding chemical products.                   | S23 |
| <b>Table S20.</b> Vectors used for <i>nan</i> expression and their corresponding chemical products.                   | S24 |
| <b>Table S21.</b> Vectors used for <i>buA</i> expression used and their corresponding chemical products.              | S25 |
| <b>Table S22.</b> Different combinations of <i>Ateafo</i> genes and their corresponding chemical products.            | S26 |
| <b>Table S23.</b> Different combinations of <i>ctv</i> genes and their corresponding chemical products.               | S27 |

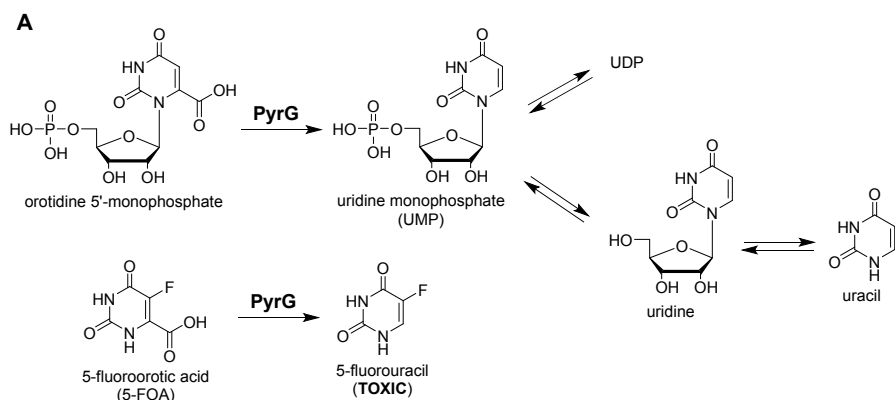

| medium                 | genotype | <i>pyrG</i> <sup>+</sup> | <i>pyrG</i> <sup>-</sup> |
|------------------------|----------|--------------------------|--------------------------|
| no supplements         |          | growth                   | no growth                |
| uridine/uracil + 5-FOA |          | no growth                | growth                   |

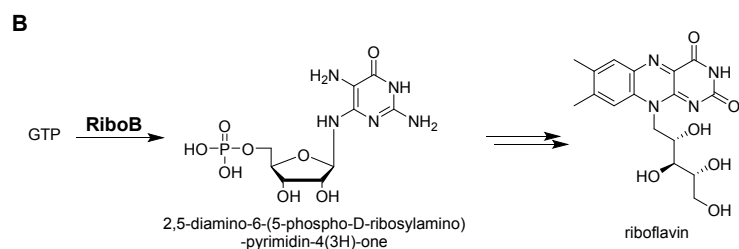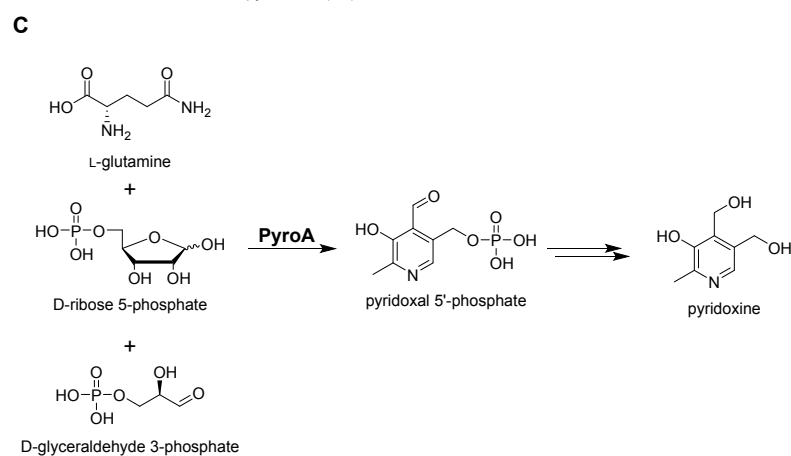

**Figure S1.** Selection principle of the auxotrophic markers *pyrG*, *riboB*, and *pyroA*. (A) *PyrG* catalyzes the conversion of orotidine 5'-monophosphate to UMP. Therefore, fungal cells with *pyrG*<sup>-</sup> require uridine/uracil to grow. *PyrG* also catalyzes the conversion of 5-FOA to 5-fluorouracil, which is toxic to fungal cells. Only fungal cells with *pyrG*<sup>-</sup> can grow in the presence of uridine/uracil and 5-FOA (counter-selection). (B) *RiboB* catalyzed the conversion of GTP to 2,5-diamino-6-(5-phospho-D-ribosylamino)-pyrimidin-4(3H)-one, a precursor of riboflavin. (C) *PyroA* catalyzed the conversion of L-glutamine, D-ribose 5-phosphate, and D-glyceraldehyde 3-phosphate to pyridoxal 5'-phosphate, a precursor of pyridoxine. Gene functions of *pyrG*, *riboB*, and *pyroA* were curated from FungiDB (<https://fungidb.org>).

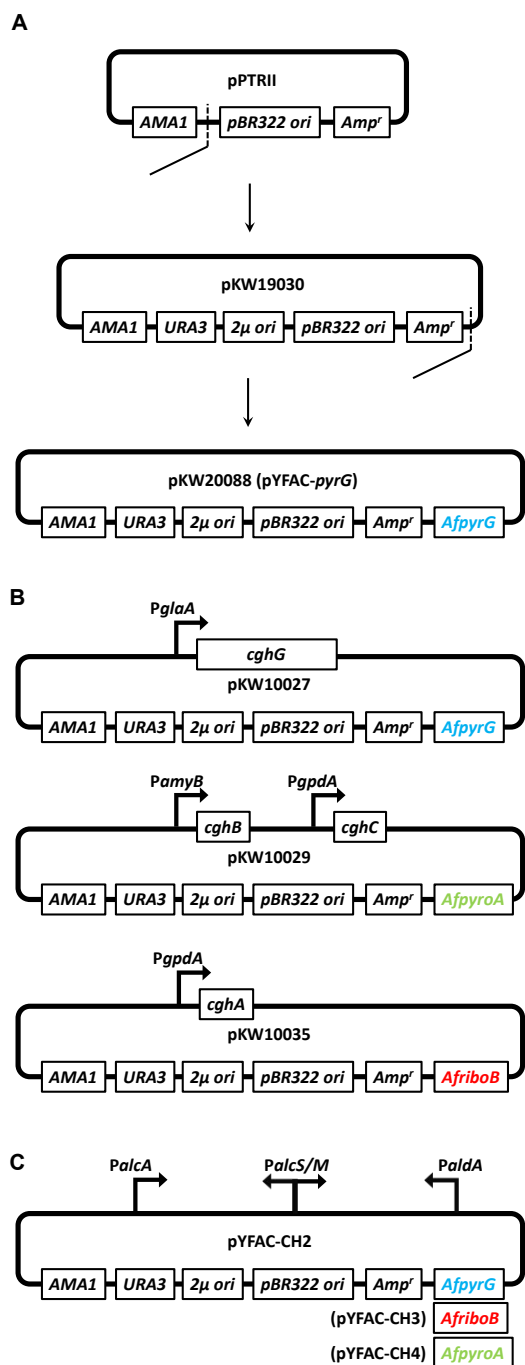

**Figure S2.** *AMA1*-based episomal expression vectors. (A) pKW20088 is derived from pPTRII, which contains the *AMA-1* replicator for extrachromosomal vector maintenance in *Aspergillus* spp. as well as pBR322 *ori* and *Amp<sup>r</sup>* for plasmid maintenance and selection in *E. coli*. Insertion of *2μ ori* and *URA3* allows plasmid maintenance and selection in *S. cerevisiae* (pKW19030). Addition of *AfpyrG* enables selection of successful transformants in *Aspergillus* (pKW20088). (B) Expression vectors used to reconstitute the biosynthesis of Sch 210972 (**1**) (see Figure 3). (C) Yeast fungal artificial chromosome (YFAC) expression vectors developed by the Chooi group allow the expression of four GOIs per vector.

**Table S1.** Vectors used for *cgh* expression and their corresponding chemical products.

| Expression cassettes                                                                                   | Enzymes expressed | Products |
|--------------------------------------------------------------------------------------------------------|-------------------|----------|
| 1. <i>PglaA-cghG_AfpYrG</i><br>2. <i>PgpdA-cghA_AfriboB</i><br>3. <i>PamyB-cghB_PgpdA-cghC_AfpyroA</i> | CghA/B/C/G        | 1        |
| 1. <i>PglaA-cghG_AfpYrG</i><br>2. <i>PamyB-cghB_PgpdA-cghC_AfpyroA</i>                                 | CghB/C/G          | 1 + 4    |

**Table S2.** Vectors used for *vir* expression and their corresponding chemical products.

| Expression cassettes                                                                                                                                                                           | Enzymes expressed | Products                                                   |
|------------------------------------------------------------------------------------------------------------------------------------------------------------------------------------------------|-------------------|------------------------------------------------------------|
| 1. <i>PglaA-virI_PgpdA-virE_PamyB-virD_PtrpC-virB_AfpyrG</i><br>2. <i>PgpdA-virK_PamyB-virJ_PglaA-virG_PtrpC-virF_AfriboB</i><br>3. <i>PamyB-virL_PtrpC-virH_PglaA-virC_PgpdA-virA_AfpyroA</i> | VirA – L          | 7 (1.2 mg/L) + 8 (0.3 mg/L) + 9 (0.4 mg/L) + 10 (0.9 mg/L) |
| 1. <i>PgpdA-virA_AfpyrG</i>                                                                                                                                                                    | VirA              | 11 (1.5 mg/L)                                              |
| 1. <i>PgpdA-virA_AfpyrG</i><br>2. <i>PgpdA-virC_AfriboB</i>                                                                                                                                    | VirA/C            | 11 (> 1.5 mg/L)                                            |
| 1. <i>PgpdA-virA_AfpyrG</i><br>2. <i>PgpdA-virC_PPEgpdA-virD_AfriboB</i>                                                                                                                       | VirA/C/D          | 11                                                         |
| 1. <i>PgpdA-virA_PPOgpdA-virB_AfpyrG</i>                                                                                                                                                       | VirA/B            | 12 (1.7 mg/L)                                              |
| 1. <i>PgpdA-virA_PPOgpdA-virB_AfpyrG</i><br>2. <i>PPEgpdA-virD_AfriboB</i>                                                                                                                     | VirA/B/D          | 9 (trace) + 10                                             |
| 1. <i>PgpdA-virA_PPOgpdA-virB_AfpyrG</i><br>2. <i>PgpdA-virC_PPEgpdA-virD_AfriboB</i>                                                                                                          | VirA – D          | 9 (trace) + 10                                             |
| 1. <i>PgpdA-virE_PamyB-virD_PtrpC-virB_AfpyrG</i><br>2. <i>PglaA-virC_PgpdA-virA_AfpyroA</i>                                                                                                   | VirA – E          | 8 (trace) + 9 (trace) + 10                                 |
| 1. <i>PamyB-virD_PtrpC-virB_AfpyrG</i><br>2. <i>PglaA-virG_AfriboB</i><br>3. <i>PglaA-virC_PgpdA-virA_AfpyroA</i>                                                                              | VirA – D/G        | 9                                                          |
| 1. <i>PgpdA-virE_PamyB-virD_PtrpC-virB_AfpyrG</i><br>2. <i>PglaA-virG_AfriboB</i><br>3. <i>PglaA-virC_PgpdA-virA_AfpyroA</i>                                                                   | VirA – E/G        | 8 + 9                                                      |
| 1. <i>PglaA-virI_PgpdA-virE_PamyB-virD_PtrpC-virB_AfpyrG</i><br>2. <i>PglaA-virG_PtrpC-virF_AfriboB</i><br>3. <i>PtrpC-virH_PglaA-virC_PgpdA-virA_AfpyroA</i>                                  | VirA – I          | 9 + 10 (trace) + 14 (trace)                                |
| 1. <i>PglaA-virI_PgpdA-virE_PamyB-virD_PtrpC-virB_AfpyrG</i><br>2. <i>PamyB-virJ_PglaA-virG_PtrpC-virF_AfriboB</i><br>3. <i>PtrpC-virH_PglaA-virC_PgpdA-virA_AfpyroA</i>                       | VirA – J          | 9 + 10 (trace) + 14 (trace)                                |
| 1. <i>PglaA-virI_PgpdA-virE_PamyB-virD_PtrpC-virB_AfpyrG</i><br>2. <i>PgpdA-virK_PglaA-virG_PtrpC-virF_AfriboB</i><br>3. <i>PamyB-virL_PtrpC-virH_PglaA-virC_PgpdA-virA_AfpyroA</i>            | VirA – I/K/L      | 7 + 8                                                      |

**Table S3.** Vectors used for *dcs* expression and their corresponding chemical products.

| Expression cassettes                                                              | Enzymes expressed | Products       |
|-----------------------------------------------------------------------------------|-------------------|----------------|
| 1. <i>PamyB-dcsA_PgpdA-dcsB_AfpyroA</i>                                           | DcsA/B            | 16 (~250 mg/L) |
| 1. <i>PglaA-dcsC_AfpyrG</i><br>2. <i>PamyB-dcsA_PgpdA-dcsB_AfpyroA</i>            | DcsA – C          | no product     |
| 1. <i>PgpdA-dcsD_AfriboB</i><br>2. <i>PamyB-dcsA_PgpdA-dcsB_AfpyroA</i>           | DcsA/B/D          | 16             |
| 1. <i>PglaA-dcsD_PgpdA-dcsC_AfpyrG</i><br>2. <i>PamyB-dcsA_PgpdA-dcsB_AfpyroA</i> | DcsA – D          | 15             |

**Table S4A.** Vectors used for *hql* expression and their corresponding chemical products.

| Expression cassettes                                                                                                         | Enzymes expressed | Products          |
|------------------------------------------------------------------------------------------------------------------------------|-------------------|-------------------|
| 1. <i>PgpdA-hqID_PglaA-hqIF_AfpyrG</i><br>2. <i>PgpdA-hqIA_PamyB-hqIB_AfriboB</i><br>3. <i>PgpdA-hqIC_PamyB-hqIE_AfpyroA</i> | HqIA – F          | 18 + 19           |
| 1. <i>PgpdA-hqIA_PamyB-hqIB_AfriboB</i><br>2. <i>PgpdA-hqIC_AfpyroA</i>                                                      | HqIA/B            | 20                |
| 1. <i>PgpdA-hqIA_PamyB-hqIB_AfriboB</i><br>2. <i>PgpdA-hqIC_AfpyroA</i>                                                      | HqIA – C          | 20 + 21           |
| 1. <i>PglaA-hqIF_AfpyrG</i><br>2. <i>PgpdA-hqIA_PamyB-hqIB_AfriboB</i><br>3. <i>PgpdA-hqIC_AfpyroA</i>                       | HqIA – C/F        | 20 + 23 + 24 + 25 |
| 1. <i>PglaA-hqIF_AfpyrG</i><br>2. <i>PgpdA-hqIA_PamyB-hqIB_AfriboB</i><br>3. <i>PgpdA-hqIC_PamyB-hqIE_AfpyroA</i>            | HqIA – C/E/F      | 18 + 19           |

**Table S4B.** Feeding of different substrates to the HqIC – F expression strain and the products identified.

| Substrates | Expression cassettes                                                              | Enzymes expressed | Products       |
|------------|-----------------------------------------------------------------------------------|-------------------|----------------|
| 20         | 1. <i>PgpdA-hqID_PglaA-hqIF_AfpyrG</i><br>2. <i>PgpdA-hqIC_PamyB-hqIE_AfpyroA</i> | HqIC – F          | 18 + 19        |
| 21         | 1. <i>PgpdA-hqID_PglaA-hqIF_AfpyrG</i><br>2. <i>PgpdA-hqIC_PamyB-hqIE_AfpyroA</i> | HqIC – F          | no new product |
| 23         | 1. <i>PgpdA-hqID_PglaA-hqIF_AfpyrG</i><br>2. <i>PgpdA-hqIC_PamyB-hqIE_AfpyroA</i> | HqIC – F          | 18 + 19 + 24   |
| 24         | 1. <i>PgpdA-hqID_PglaA-hqIF_AfpyrG</i><br>2. <i>PgpdA-hqIC_PamyB-hqIE_AfpyroA</i> | HqIC – F          | no new product |



**Table S5.** Vectors used for *frz* expression and their corresponding chemical products.

| Expression cassettes                                                                                                                                                                                 | Enzymes expressed | Products                                                          |
|------------------------------------------------------------------------------------------------------------------------------------------------------------------------------------------------------|-------------------|-------------------------------------------------------------------|
| 1. <i>PgpdA-frzA_AfriboB</i><br>2. <i>PglaA-frzB_AfpyroA</i>                                                                                                                                         | FrzA/B            | <b>30</b> (10 mg/L)                                               |
| 1. <i>PgpdA-frzA_PglaA-frzC_AfriboB</i><br>2. <i>PglaA-frzB_AfpyroA</i>                                                                                                                              | FrzA – C          | <b>30 + 31</b>                                                    |
| 1. <i>PglaA-frzD_PgpdA-frzC_AfpyrG</i><br>2. <i>PgpdA-frzA_PglaA-frzC_AfriboB</i><br>3. <i>PglaA-frzB_AfpyroA</i>                                                                                    | FrzA – D          | <b>30 + 31 + 32</b>                                               |
| 1. <i>PglaA-frzD_PgpdA-frzC_AfpyrG</i><br>2. <i>PgpdA-frzA_PglaA-frzC_AfriboB</i><br>3. <i>PamyB-frzE_PglaA-frzB_AfpyroA</i>                                                                         | FrzA – E          | <i>N</i> -methyl- <b>32</b>                                       |
| 1. <i>PglaA-frzD_PgpdA-frzC_PamyB-frzF_AfpyrG</i><br>2. <i>PgpdA-frzA_PglaA-frzC_AfriboB</i><br>3. <i>PglaA-frzB_AfpyroA</i>                                                                         | FrzA – D/F        | <i>O</i> -methyl- <b>32</b>                                       |
| 1. <i>PglaA-frzD_PgpdA-frzC_PamyB-frzF_AfpyrG</i><br>2. <i>PgpdA-frzA_PglaA-frzC_AfriboB</i><br>3. <i>PamyB-frzE_PglaA-frzB_AfpyroA</i>                                                              | FrzA – F          | <b>30 + 33</b>                                                    |
| 1. <i>PglaA-frzD_PgpdA-frzC_PamyB-frzF_AfpyrG</i><br>2. <i>PgpdA-frzA_PglaA-frzG_AfriboB</i><br>3. <i>PamyB-frzE_PglaA-frzB_AfpyroA</i>                                                              | FrzA – G          | <b>36</b>                                                         |
| 1. <i>PglaA-frzD_PgpdA-frzC_PamyB-frzF_AfpyrG</i><br>2. <i>PgpdA-frzA_PglaA-frzG_AfriboB</i><br>3. <i>PamyB-frzE_PPOgpdA-frzH_PglaA-frzB_AfpyroA</i>                                                 | FrzA – H          | <b>36 + 37</b>                                                    |
| 1. <i>PglaA-frzD_PgpdA-frzC_PamyB-frzF_AfpyrG</i><br>2. <i>PgpdA-frzA_PglaA-frzI_PamyB-frzG_AfriboB</i><br>3. <i>PamyB-frzE_PPOgpdA-frzH_PglaA-frzB_AfpyroA</i>                                      | FrzA – I          | <b>36 + 38</b> (3 mg/L)                                           |
| 1. <i>PglaA-frzD_PgpdA-frzC_PamyB-frzF_AfpyrG</i><br>2. <i>PgpdA-frzA_PglaA-frzI_PamyB-frzG_AfriboB</i><br>3. <i>PamyB-frzE_PPOgpdA-frzH_PgpdA-frzJ_PglaA-frzB_AfpyroA</i>                           | FrzA – J          | no detectable <b>28</b> ,<br><b>36</b> , <b>37</b> , or <b>38</b> |
| 1. <i>PglaA-frzD_PgpdA-frzC_PamyB-frzF_PPOgpdA-frzK_AfpyrG</i><br>2. <i>PgpdA-frzA_PglaA-frzI_PamyB-frzG_PPOgpdA-frzJ_AfriboB</i><br>3. <i>PamyB-frzE_PPOgpdA-frzH_PglaA-frzB_AfpyroA</i>            | FrzA – K          | <b>28</b> (1 mg/L) + <b>36</b> +<br><b>38</b>                     |
| 1. <i>PglaA-frzD_PgpdA-frzC_PamyB-frzF_PPOgpdA-frzK_AfpyrG</i><br>2. <i>PgpdA-frzA_PglaA-frzI_PamyB-frzG_PPOgpdA-frzJ_AfriboB</i><br>3. <i>PamyB-frzE_PPOgpdA-frzH_PgpdA-frzL_PglaA-frzB_AfpyroA</i> | FrzA – L          | <b>28 + 36 + 38</b>                                               |

**Table S6.** Vectors used for *qlt* expression and their corresponding chemical products.

| Expression cassettes                                                                                                  | Enzymes expressed | Products     |
|-----------------------------------------------------------------------------------------------------------------------|-------------------|--------------|
| 1. <i>PgpdA-qltA_AfpyrG</i><br>2. <i>PgpdA-qltB_AfriboB</i><br>3. <i>PgpdA-qltD_PPOgpdA-qltC_PPEgpdA-qltE_AfpyroA</i> | QltA – E          | 39 (5 mg/L)  |
| 1. <i>PgpdA-qltA_AfpyrG</i><br>2. <i>PgpdA-qltB_AfriboB</i><br>3. <i>PgpdA-qltD_PPEgpdA-qltE_AfpyroA</i>              | QltA/B/D/E        | 39 (~5 mg/L) |
| 1. <i>PgpdA-qltA_AfpyrG</i><br>2. <i>PgpdA-qltB_AfriboB</i><br>3. <i>PgpdA-qltD_PPOgpdA-qltC_AfpyroA</i>              | QltA – D          | no product   |
| 1. <i>PgpdA-qltA_AfpyrG</i><br>2. <i>PgpdA-qltB_PPEgpdA-qltE_AfriboB</i><br>3. <i>PgpdA-qltC_AfpyroA</i>              | QltA – C/E        | no product   |
| 1. <i>PgpdA-qltD_PPOgpdA-qltC_PPEgpdA-qltE_AfpyroA</i>                                                                | QltC – E          | no product   |

**Table S7.** Vectors used for *pvh* expression and their corresponding chemical products.

| Expression cassettes                                                                                              | Enzymes expressed | Products     |
|-------------------------------------------------------------------------------------------------------------------|-------------------|--------------|
| 1. <i>PglaA-pvhC_AfpyrG</i><br>2. <i>PgpdA-pvhA_AfriboB</i><br>3. <i>PamyB-pvhB_PgpdA-pvhE_PglaA-pvhD_AfpyroA</i> | PvhA – E          | 44           |
| 1. <i>PglaA-pvhC_AfpyrG</i><br>2. <i>PgpdA-pvhA_AfriboB</i><br>3. <i>PamyB-pvhB_PgpdA-pvhE_AfpyroA</i>            | PvhA – C/E        | 45           |
| 1. <i>PglaA-pvhC_AfpyrG</i><br>2. <i>PgpdA-pvhA_AfriboB</i>                                                       | PvhA/C            | 46 + 47 + 48 |
| 1. <i>PglaA-pvhC_AfpyrG</i><br>2. <i>PgpdA-pvhA_AfriboB</i><br>3. <i>PamyB-pvhB_AfpyroA</i>                       | PvhA – C          | 46 + 47 + 48 |
| 1. <i>PglaA-pvhC_AfpyrG</i><br>2. <i>PgpdA-pvhA_AfriboB</i><br>3. <i>PgpdA-pvhE_AfpyroA</i>                       | PvhA/C/E          | 49           |
| 1. <i>PglaA-pvhC_AfpyrG</i><br>2. <i>PgpdA-pvhA_AfriboB</i><br>3. <i>PgpdA-pvhE_PglaA-pvhD_AfpyroA</i>            | PvhA/C/D/E        | 50           |

**Table S8.** Vectors used for *lep* expression and their corresponding chemical products.

| Expression cassettes                                                                                                         | Enzymes expressed | Products                                                                            |
|------------------------------------------------------------------------------------------------------------------------------|-------------------|-------------------------------------------------------------------------------------|
| 1. <i>PglaA-lepA_AfpyrG</i><br>2. <i>PgpdA-lepG_AfriboB</i><br>3. <i>PamyB-lepH_AfpyroA</i>                                  | LepA/G/H          | 52                                                                                  |
| 1. <i>PglaA-lepA_AfpyrG</i><br>2. <i>PgpdA-lepG_PamyB-lepF_AfriboB</i><br>3. <i>PamyB-lepH_AfpyroA</i>                       | LepA/F/G/H        | 54 (1.2 mg/L) + 55 (1.8 mg/L) +<br>56 (4.2 mg/L) + 57 (4.3 mg/L) +<br>58 (5.4 mg/L) |
| 1. <i>PglaA-lepA_AfpyrG</i><br>2. <i>PgpdA-lepG_PamyB-lepF_AfriboB</i><br>3. <i>PglaA-lepI_PamyB-lepH_AfpyroA</i>            | LepA/F/G/H/I      | 54                                                                                  |
| 1. <i>PglaA-lepA_AfpyrG</i><br>2. <i>PgpdA-lepG_PamyB-lepF_AfriboB</i><br>3. <i>PglaA-lepI_PamyB-lepH_PgpdA-lepD_AfpyroA</i> | LepA/D/F/G/H/I    | 51                                                                                  |

**Table S9.** Vectors used for *icc* expression and their corresponding chemical products.

| Expression cassettes                                                                                    | Enzymes expressed | Products                                     |
|---------------------------------------------------------------------------------------------------------|-------------------|----------------------------------------------|
| 1. <i>PglaA-iccA_PgpdA-iccB_AfpYrG</i>                                                                  | <i>IccA/B</i>     | <b>61</b> (20 mg/L)                          |
| 1. <i>PglaA-iccA_PgpdA-iccB_AfpYrG</i><br>2. <i>PgpdA-iccC_AfriboB</i>                                  | <i>IccA – C</i>   | <b>61 + 62</b> (20 mg/L) + <b>63</b> (trace) |
| 1. <i>PglaA-iccA_PgpdA-iccB_AfpYrG</i><br>2. <i>PgpdA-iccC_PgpdA-cyb5_PgpdA-iccD_AfriboB</i>            | <i>IccA – D</i>   | <b>61 + 63</b> (10 mg/L)                     |
| 1. <i>PglaA-iccA_PgpdA-iccB_AfpYrG</i><br>2. <i>PgpdA-iccC_PgpdA-cyb5_PgpdA-iccD_PglaA-iccE_AfriboB</i> | <i>IccA – E</i>   | <b>60</b> (10 mg/L) + <b>61</b>              |

*cyb5* encodes for transmembrane cytochrome P450 reductase (CPR). Fungal class II P450s microsomal transmembrane enzymes are often associated with CPR partnering enzymes, and together they modulate electron transfer from NADPH.

**Table S10.** Vectors used for *har* expression and their corresponding chemical products.

| Expression cassettes                                                                                                                    | Enzymes expressed | Products                                                      |
|-----------------------------------------------------------------------------------------------------------------------------------------|-------------------|---------------------------------------------------------------|
| 1. <i>PglaA-harA_AfpyrG</i><br>2. <i>PamyB-harC_PgpdA-harE_PglaA-harF_AfriboB</i><br>3. <i>PglaA-harB_PgpdA-harD_PamyB-harG_AfpyroA</i> | HarA – G          | 65 (0.5 mg/L) + 68 (5.0 mg/L) + 69 (2.5 mg/L) + 70 (3.0 mg/L) |
| 1. <i>PglaA-harA_AfpyrG</i><br>2. <i>PgpdA-harE_AfriboB</i>                                                                             | HarA/E            | 71 (7.5 mg/L)                                                 |
| 1. <i>PglaA-harA_AfpyrG</i><br>2. <i>PgpdA-harE_AfriboB</i><br>3. <i>PamyB-harG_AfpyroA</i>                                             | HarA/E/G          | 68 + 71 + 72 (7.5 mg/L)                                       |
| 1. <i>PglaA-harA_AfpyrG</i><br>2. <i>PgpdA-harE_AfriboB</i><br>3. <i>PglaA-harB_PamyB-harG_AfpyroA</i>                                  | HarA/B/E/G        | 68 + 71 + 72                                                  |
| 1. <i>PglaA-harA_AfpyrG</i><br>2. <i>PglaA-harC_PgpdA-harE_AfriboB</i><br>3. <i>PamyB-harG_AfpyroA</i>                                  | HarA/C/E/G        | 68 + 71 + 72                                                  |
| 1. <i>PglaA-harA_AfpyrG</i><br>2. <i>PgpdA-harE_AfriboB</i><br>3. <i>PgpdA-harD_PamyB-harG_AfpyroA</i>                                  | HarA/D/E/G        | 68 + 71 + 72 + 74 (0.5 mg/L)                                  |
| 1. <i>PglaA-harA_AfpyrG</i><br>2. <i>PgpdA-harE_PglaA-harF_AfriboB</i><br>3. <i>PamyB-harG_AfpyroA</i>                                  | HarA/E/F/G        | 68 + 71 + 72                                                  |
| 1. <i>PglaA-harA_AfpyrG</i><br>2. <i>PgpdA-harE_AfriboB</i><br>3. <i>PglaA-harB_PgpdA-harD_PamyB-harG_AfpyroA</i>                       | HarA/B/D/E/G      | 68 + 69 + 70                                                  |
| 1. <i>PglaA-harA_AfpyrG</i><br>2. <i>PglaA-harC_PgpdA-harE_AfriboB</i><br>3. <i>PgpdA-harD_PamyB-harG_AfpyroA</i>                       | HarA/C/D/E/G      | 68 + 71 + 72 + 74                                             |
| 1. <i>PglaA-harA_AfpyrG</i><br>2. <i>PgpdA-harE_PglaA-harF_AfriboB</i><br>3. <i>PgpdA-harD_PamyB-harG_AfpyroA</i>                       | HarA/D/E/F/G      | 68 + 71 + 72 + 74                                             |
| 1. <i>PglaA-harA_AfpyrG</i><br>2. <i>PglaA-harC_PgpdA-harE_AfriboB</i><br>3. <i>PglaA-harB_PgpdA-harD_PamyB-harG_AfpyroA</i>            | HarA – E & G      | 65 + 68 + 69 + 70                                             |
| 1. <i>PglaA-harA_AfpyrG</i><br>2. <i>PgpdA-harE_PglaA-harF_AfriboB</i><br>3. <i>PglaA-harB_PgpdA-harD_PamyB-harG_AfpyroA</i>            | HarA/B/D/E/F/G    | 68 + 69 + 70                                                  |

**Table S11.** Vectors used for *pfp* expression and their corresponding chemical products.

| Expression cassettes                                                                                                | Enzymes expressed | Products                                                      |
|---------------------------------------------------------------------------------------------------------------------|-------------------|---------------------------------------------------------------|
| 1. <i>PglaA-pfpA_AfpyrG</i>                                                                                         | <b>PfpA</b>       | <b>76</b> (30 mg/L)                                           |
| 1. <i>PglaA-pfpA_AfpyrG</i><br>2. <i>PgpdA-pfpB_AfriboB</i>                                                         | <b>PfpA/B</b>     | <b>76 + 78</b> (15 mg/L)                                      |
| 1. <i>PglaA-pfpA_PgpdA-pfpC_AfpyrG</i><br>2. <i>PgpdA-pfpB_AfriboB</i>                                              | <b>PfpA – C</b>   | <b>76 + 78 + 79</b> (8 mg/L) +<br><b>80</b> (10 mg/L)         |
| 1. <i>PglaA-pfpA_PgpdA-pfpC_AfpyrG</i><br>2. <i>PgpdA-pfpB_PPOgpdA-pfpD_AfriboB</i>                                 | <b>PfpA – D</b>   | <b>76 + 78 + 79 + 80 + 85 + 86</b>                            |
| 1. <i>PglaA-pfpA_PgpdA-pfpC_AfpyrG</i><br>2. <i>PgpdA-pfpB_PPOgpdA-pfpD_AfriboB</i><br>3. <i>PgpdA-pfpE_AfpyroA</i> | <b>PfpA – E</b>   | <b>75/75'</b> (0.8 mg/L) + <b>76 + 78 + 79 + 80 + 85 + 86</b> |

**Table S12.** Vectors used for *fub* expression and their corresponding chemical products.

| Expression cassettes                                                                                                                                                                                 | Enzymes expressed | Products |
|------------------------------------------------------------------------------------------------------------------------------------------------------------------------------------------------------|-------------------|----------|
| 1. PgpdA- <b>fub1</b> _PglaA- <b>fub4</b> _Afp <sub>yr</sub> G<br>2. PgpdA- <b>fub7</b> _PglaA- <b>fub6</b> _PamyB- <b>fub8</b> _Afr <sub>ibo</sub> B                                                | Fub1/4/6/7/8      | 88       |
| 1. PgpdA- <b>fub1</b> _PglaA- <b>fub4</b> _Afp <sub>yr</sub> G<br>2. PgpdA- <b>fub7</b> _PglaA- <b>fub6</b> _PamyB- <b>fub8</b> _Afr <sub>ibo</sub> B<br>3. PamyB- <b>fub9</b> _Afp <sub>yr</sub> oA | Fub1/4/6/7/8/9    | 87       |



**Table S13.** Vectors used for *thm* expression and their corresponding chemical products.

| Expression cassettes                                                                                                                    | Enzymes expressed | Products              |
|-----------------------------------------------------------------------------------------------------------------------------------------|-------------------|-----------------------|
| 1. <i>PglaA-thmA_AfpyrG</i><br>2. <i>PgpdA-thmB_PglaA-thmF_PamyB-thmG_AfriboB</i><br>3. <i>PamyB-thmC_PglaA-thmD_PgpdA-thmE_AfpyroA</i> | ThmA – G          | 94 + 96 + 99 + 100    |
| 1. <i>PglaA-thmA_AfpyrG</i><br>2. <i>PgpdA-thmB_AfriboB</i>                                                                             | ThmA/B            | 101 + 102             |
| 1. <i>PglaA-thmA_AfpyrG</i><br>2. <i>PgpdA-thmB_AfriboB</i><br>3. <i>PamyB-thmC_AfpyroA</i>                                             | ThmA – C          | 97 + 98               |
| 1. <i>PglaA-thmA_AfpyrG</i><br>2. <i>PgpdA-thmB_PglaA-thmE_AfriboB</i>                                                                  | ThmA/B/E          | 103 + 104 + 105 + 106 |
| 1. <i>PglaA-thmA_AfpyrG</i><br>2. <i>PgpdA-thmB_PamyB-thmC_PglaA-thmE_AfriboB</i>                                                       | ThmA – C/E        | 94 + 96 + 99 + 100    |

**Table S14.** Vectors used for *cm3* expression and their corresponding chemical products.

| Expression cassettes                                                                                   | Enzymes expressed | Products                                    |
|--------------------------------------------------------------------------------------------------------|-------------------|---------------------------------------------|
| 1. <i>PglaA-cm3A_AfpyrG</i><br>2. <i>PgpdA-cm3C_PglaA-cm3D_Afribob</i><br>3. <i>PamyB-cm3B_AfpyroA</i> | Cm3A – D          | <b>107</b> (13 mg/L) + <b>108</b> (18 mg/L) |

**Table S15.** Vectors used for *Pgmpa* expression and their corresponding chemical products.

| Expression cassettes                                                                                                         | Enzymes expressed | Products                |
|------------------------------------------------------------------------------------------------------------------------------|-------------------|-------------------------|
| 1. <i>PglaA-PgmpaC_AfpyrG</i><br>2. <i>PgpdA-PgmpaDE_PglaA-PgmpaA_AfriboB</i>                                                | PgMpaA/C/DE       | 110 + 111               |
| 1. <i>PglaA-PgmpaC_AfpyrG</i><br>2. <i>PgpdA-PgmpaDE_PglaA-PgmpaA_PamyB-PgmpaB_AfriboB</i><br>3. <i>PamyB-PgmpaG_AfpyroA</i> | PgMpaA – C/DE/G   | 109 + 110 + 112 (trace) |

**Table S16A.** Vectors used for *flv* expression and their corresponding chemical products.

| Expression cassettes <sup>a</sup>                                                                                                                                                                                                     | Enzymes expressed | Products                        |
|---------------------------------------------------------------------------------------------------------------------------------------------------------------------------------------------------------------------------------------|-------------------|---------------------------------|
| 1. PPEgpdA- <i>flvD</i> _Pgpda- <i>flvE</i> _PPOgpdA- <i>flvF</i> _AfpYrG<br>2. Pgpda- <i>flvC</i> _PPOgpdA- <i>flvG</i> _PPEgpdA- <i>flvH</i> _AfriboB<br>3. Pgpda- <i>flvA</i> _PPOgpdA- <i>flvB</i> _PPEgpdA- <i>flvI</i> _AfpYrOA | FlvA – I          | 116 (1.2 mg/L)                  |
| 1. PPEgpdA- <i>flvD</i> _Pgpda- <i>flvE</i> _PPOgpdA- <i>flvF</i> _AfpYrG<br>2. Pgpda- <i>flvC</i> _PPOgpdA- <i>flvG</i> _PPEgpdA- <i>flvH</i> _AfriboB<br>3. Pgpda- <i>flvA</i> _PPOgpdA- <i>flvB</i> _AfpYrOA                       | FlvA – H          | 117 (1.2 mg/L) + 118 (0.9 mg/L) |
| 1. PPEgpdA- <i>flvD</i> _Pgpda- <i>flvE</i> _PPOgpdA- <i>flvF</i> _AfpYrG<br>2. Pgpda- <i>flvC</i> _PPOgpdA- <i>flvG</i> _PPEgpdA- <i>flvH</i> _AfriboB                                                                               | FlvC – H          | 118                             |
| 1. Pgpda- <i>flvA</i> _PPOgpdA- <i>flvB</i> _AfpYrOA                                                                                                                                                                                  | FlvA/B            | 117                             |
| 1. PPEgpdA- <i>flvD</i> _PPOgpdA- <i>flvF</i> _AfpYrG<br>2. Pgpda- <i>flvC</i> _PPOgpdA- <i>flvG</i> _PPEgpdA- <i>flvH</i> _AfriboB                                                                                                   | FlvC/D/F/G/H      | no product                      |
| 1. PPEgpdA- <i>flvD</i> _Pgpda- <i>flvE</i> _AfpYrG<br>2. Pgpda- <i>flvC</i> _PPOgpdA- <i>flvG</i> _PPEgpdA- <i>flvH</i> _AfriboB                                                                                                     | FlvC – E/G/H      | 120a/120b                       |
| 1. PPEgpdA- <i>flvD</i> _Pgpda- <i>flvE</i> _AfpYrG<br>2. Pgpda- <i>flvC</i> _AfriboB                                                                                                                                                 | FlvC – E          | 120a/120b                       |
| 1. PPEgpdA- <i>flvD</i> _Pgpda- <i>flvE</i> _AfpYrG                                                                                                                                                                                   | FlvD/E            | 121a/121b                       |
| 1. PPEgpdA- <i>flvD</i> _Pgpda- <i>flvE</i> _PPOgpdA- <i>flvF</i> _AfpYrG<br>2. PPOgpdA- <i>flvG</i> _PPEgpdA- <i>flvH</i> _AfriboB                                                                                                   | FlvD – H          | 122                             |
| 1. PPEgpdA- <i>flvD</i> _Pgpda- <i>flvE</i> _PPOgpdA- <i>flvF</i> _AfpYrG<br>2. Pgpda- <i>flvC</i> _AfriboB<br>3. PPOgpdA- <i>flvG</i> _AfpYrOA                                                                                       | FlvC – G          | 118 (trace)                     |
| 1. PPEgpdA- <i>flvD</i> _Pgpda- <i>flvE</i> _PPOgpdA- <i>flvF</i> _AfpYrG<br>2. Pgpda- <i>flvC</i> _AfriboB                                                                                                                           | FlvC – F          | 120a/120b                       |

<sup>a</sup>PPEgpdA and PPOgpdA are *gpdA* promoters from *Penicillium expansum* and *Penicillium oxalicum*, respectively.

**Table S16B.** Feeding of different substrates to the various Flv expression strains and the products identified.

| Substrates | Expression cassettes <sup>a</sup>                                                                                                               | Enzymes expressed | Products   |
|------------|-------------------------------------------------------------------------------------------------------------------------------------------------|-------------------|------------|
| 117 + 118  | 1. PPEgpdA- <i>flvI</i> _AfpYrOA                                                                                                                | FlvI              | 116 + 117  |
| 118        | 1. Pgpda- <i>flvA</i> _PPOgpdA- <i>flvB</i> _PPEgpdA- <i>flvI</i> _AfpYrOA                                                                      | FlvA/B/I          | 116 + 117  |
| 119        | 1. PPEgpdA- <i>flvD</i> _PPOgpdA- <i>flvF</i> _AfpYrG<br>2. PPOgpdA- <i>flvG</i> _PPEgpdA- <i>flvH</i> _AfriboB                                 | FlvD/F/G/H        | 122        |
| 121a/121b  | 1. PPEgpdA- <i>flvD</i> _PPOgpdA- <i>flvF</i> _AfpYrG<br>2. PPOgpdA- <i>flvG</i> _PPEgpdA- <i>flvH</i> _AfriboB                                 | FlvD/F/G/H        | no product |
| 124        | 1. PPEgpdA- <i>flvD</i> _Pgpda- <i>flvE</i> _AfpYrG                                                                                             | FlvD/E            | 121a/121b  |
| 124        | 1. PPEgpdA- <i>flvD</i> _Pgpda- <i>flvE</i> _PPOgpdA- <i>flvF</i> _AfpYrG                                                                       | FlvD – F          | 122        |
| 125        | 1. PPEgpdA- <i>flvD</i> _Pgpda- <i>flvE</i> _PPOgpdA- <i>flvF</i> _AfpYrG<br>2. Pgpda- <i>flvC</i> _AfriboB<br>3. PPOgpdA- <i>flvG</i> _AfpYrOA | FlvC – G          | 118        |
| 125        | 1. PPEgpdA- <i>flvD</i> _Pgpda- <i>flvE</i> _PPOgpdA- <i>flvF</i> _AfpYrG<br>2. Pgpda- <i>flvC</i> _AfriboB                                     | FlvC – F          | 120a/120b  |
| 124        | 1. PPEgpdA- <i>flvD</i> _Pgpda- <i>flvE</i> _PPOgpdA- <i>flvF</i> _AfpYrG<br>2. Pgpda- <i>flvC</i> _AfriboB                                     | FlvC – F          | 118        |

<sup>a</sup>PPEgpdA and PPOgpdA are *gpdA* promoters from *Penicillium expansum* and *Penicillium oxalicum*, respectively.

**Table S17.** Vectors used for *elc* expression and their corresponding chemical products.

| Expression cassettes                                                                                                         | Enzymes expressed | Products                            |
|------------------------------------------------------------------------------------------------------------------------------|-------------------|-------------------------------------|
| 1. <i>PalcA-elcA_AfpyrG</i>                                                                                                  | ElcA              | 127 + unknown                       |
| 1. <i>PalcA-elcA_AfpyrG</i><br>2. <i>PalcM-elcB-MT_AfriboB</i>                                                               | ElcA/B-MT         | 128                                 |
| 1. <i>PalcA-elcA_AfpyrG</i><br>2. <i>PalcM-elcB_AfriboB</i>                                                                  | ElcA/B            | 129 + 130 + 131                     |
| 1. <i>PalcA-elcA_AfpyrG</i><br>2. <i>PalcM-elcB_AfriboB</i><br>3. <i>PalcS-elcD_AfpyroA</i>                                  | ElcA/B/D          | 133                                 |
| 1. <i>PalcA-elcA_AfpyrG</i><br>2. <i>PalcS-elcB_PalcM-elcE_AfriboB</i><br>3. <i>PalcS-elcD_AfpyroA</i>                       | ElcA/B/D/E        | 129 (trace) + 131 (trace) + 133     |
| 1. <i>PalcA-elcA_AfpyrG</i><br>2. <i>PalcS-elcB_PalcM-elcE_AfriboB</i><br>3. <i>PalcS-elcD_PalcM-elcF_PalcA-elcG_AfpyroA</i> | ElcA/B/D/E/F/G    | 129 + 131 + 133 + (P)-135 + (P)-136 |

**Table S18.** Vectors used for *vdt* expression and their corresponding chemical products.

| Expression cassettes                                                                                                                   | Enzymes expressed | Products                                                                                                                                                                                                                            |
|----------------------------------------------------------------------------------------------------------------------------------------|-------------------|-------------------------------------------------------------------------------------------------------------------------------------------------------------------------------------------------------------------------------------|
| 1. <i>PalcA-vdtA_AfpYrG</i>                                                                                                            | VdtA              | <b>139</b>                                                                                                                                                                                                                          |
| 1. <i>PalcA-vdtA_AfpYrG</i><br>2. <i>PalcM-vdtC_AfpYrA</i>                                                                             | VdtA/C            | <b>140</b>                                                                                                                                                                                                                          |
| 1. <i>PalcA-vdtA_AfpYrG</i><br>2. <i>PalcM-vdtC_PaldA-vdtF_AfpYrA</i>                                                                  | VdtA/C/F          | <b>141</b>                                                                                                                                                                                                                          |
| 1. <i>PalcA-vdtA_AfpYrG</i><br>2. <i>PalcA-vdtE_PalcM-vdtC_AfpYrA</i>                                                                  | VdtA/C/E          | <b>142 + 143</b> (major)                                                                                                                                                                                                            |
| 1. <i>PalcA-vdtA_AfpYrG</i><br>2. <i>PalcA-vdtE_PalcM-vdtC_PaldA-vdtF_AfpYrA</i>                                                       | VdtA/C/E/F        | <b>144 + 145</b>                                                                                                                                                                                                                    |
| 1. <i>PalcA-vdtA_AfpYrG</i><br>2. <i>PalcA-vdtE_PalcS-vdtD_PalcM-vdtC_AfpYrA</i>                                                       | VdtA/C/D/E        | <b>142</b> (major) + <b>143</b>                                                                                                                                                                                                     |
| 1. <i>PalcA-vdtA_AfpYrG</i><br>2. <i>PalcA-vdtE_PalcS-vdtD_PalcM-vdtC_PaldA-vdtF_AfpYrA</i>                                            | VdtA/C/D/E/F      | <b>144</b>                                                                                                                                                                                                                          |
| 1. <i>PalcA-vdtA_AfpYrG</i><br>2. <i>PalcA-vdtB_AfriboB</i><br>2. <i>PalcA-vdtE_PalcM-vdtC_PaldA-vdtF_AfpYrA</i>                       | VdtA – C/E/F      | ( <i>M</i> )- <b>138</b> <sup>a</sup> (trace) + ( <i>P</i> )- <b>138</b> <sup>a</sup> (trace) + ( <i>M</i> )- <b>146</b> <sup>a</sup> + ( <i>P</i> )- <b>146</b> <sup>a</sup> + ( <i>P</i> )- <b>147</b> + ( <i>P</i> )- <b>148</b> |
| 1. <i>PalcA-vdtA_AfpYrG</i><br>2. <i>PalcA-vdtB_AfriboB</i><br>3. <i>PalcA-vdtE_PalcS-vdtD_PalcM-vdtC_PaldA-vdtF_AfpYrA</i>            | VdtA – F          | ( <i>M</i> )- <b>138</b> <sup>b</sup> + ( <i>P</i> )- <b>138</b> <sup>b</sup> + <b>144</b>                                                                                                                                          |
| 1. <i>PalcA-vdtA_AfpYrG</i><br>2. <i>PalcA-vdtB_PalcM-orf1_AfriboB</i><br>3. <i>PalcA-vdtE_PalcS-vdtD_PalcM-vdtC_PaldA-vdtF_AfpYrA</i> | VdtA – F/ORF1     | ( <i>M</i> )- <b>138</b> <sup>b</sup> + ( <i>P</i> )- <b>138</b> <sup>b</sup> + <b>144</b>                                                                                                                                          |

<sup>a</sup>: The ratio of (*M*)-**138**:(*P*)-**138** and (*M*)-**146**:(*P*)-**146** is 1:2. <sup>b</sup>: The ratio of (*M*)-**138**:(*P*)-**138** is 20:1.

**Table S19.** Vectors used for *sth* expression and their corresponding chemical products.

| Expression cassettes                                                                                              | Enzymes expressed | Products                              |
|-------------------------------------------------------------------------------------------------------------------|-------------------|---------------------------------------|
| 1. <i>PalcA-sthA_AfpyrG</i><br>2. <i>PalcA-sthE_AfriboB</i>                                                       | SthA/E            | 153                                   |
| 1. <i>PalcA-sthA_AfpyrG</i><br>2. <i>PalcA-sthE_PalcM-sthC_AfriboB</i>                                            | SthA/C/E          | 154                                   |
| 1. <i>PalcA-sthA_AfpyrG</i><br>2. <i>PalcA-sthE_PalcS-sthF_AfriboB</i>                                            | SthA/E/F          | 150 (trace) + 151 (trace) + 153 + 155 |
| 1. <i>PalcA-sthA_AfpyrG</i><br>2. <i>PalcA-sthE_PalcS-sthF_PalcM-sthC_AfriboB</i>                                 | SthA/C/E/F        | 150                                   |
| 1. <i>PalcA-sthA_AfpyrG</i><br>2. <i>PalcA-sthE_PalcS-sthF_PalcM-sthB_AfriboB</i>                                 | SthA/B/E/F        | 151 + 153 + 155 + 156                 |
| 1. <i>PalcA-sthA_AfpyrG</i><br>2. <i>PalcA-sthE_PalcS-sthF_AfriboB</i><br>3. <i>PalcA-sthD_PalcM-sthB_AfpyroA</i> | SthA/B/D/E/F      | 149 + 153 (trace) + 156 (trace)       |
| 1. <i>PalcA-sthA_AfpyrG</i><br>2. <i>PalcA-sthE_PalcS-sthF_AfriboB</i><br>3. <i>PalcA-sthD_AfpyroA</i>            | SthA/D/E/F        | 151 (trace) + 153 + 155 (trace) + 157 |

**Table S20.** Vectors used for *nan* expression and their corresponding chemical products.

| Expression cassettes                                                                                                         | Enzymes expressed | Products                                                                    |
|------------------------------------------------------------------------------------------------------------------------------|-------------------|-----------------------------------------------------------------------------|
| 1. <i>PalcA-nanA_AfpyrG</i>                                                                                                  | NanA              | no product                                                                  |
| 1. <i>PalcA-nanA_AfpyrG</i><br>2. <i>PalcA-nanC_AfriboB</i>                                                                  | NanA/C            | 159                                                                         |
| 1. <i>PalcA-nanA_AfpyrG</i><br>2. <i>PalcA-nanC_PaldA-nanD_AfriboB</i>                                                       | NanA/C/D          | 160                                                                         |
| 1. <i>PalcA-nanA_AfpyrG</i><br>2. <i>PalcA-nanC_AfriboB</i><br>3. <i>PalcA-nanE_AfpyroA</i>                                  | NanA/C/E          | 159 + 161                                                                   |
| 1. <i>PalcA-nanA_AfpyrG</i><br>2. <i>PalcA-nanC_PalcS-nanF_AfriboB</i>                                                       | NanA/C/F          | 159                                                                         |
| 1. <i>PalcA-nanA_AfpyrG</i><br>2. <i>PalcA-nanC_PaldA-nanD_AfriboB</i><br>3. <i>PalcA-nanE_AfpyroA</i>                       | NanA/C/D/E        | 159 + 161 + 162                                                             |
| 1. <i>PalcA-nanA_AfpyrG</i><br>2. <i>PalcA-nanC_PalcS-nanF_PalcM-nanB_AfriboB</i>                                            | NanA – C/F        | 159                                                                         |
| 1. <i>PalcA-nanA_AfpyrG</i><br>2. <i>PalcA-nanC_PalcS-nanF_PaldA-nanD_AfriboB</i>                                            | NanA/C/D/F        | 159 (trace) + 160 + 163 <sup>a</sup>                                        |
| 1. <i>PalcA-nanA_AfpyrG</i><br>2. <i>PalcA-nanC_PalcS-nanF_PaldA-nanD_AfriboB</i><br>3. <i>PalcA-nanE_AfpyroA</i>            | NanA/C/D/E/F      | 159 (trace) + 160 + 161 + 162 (trace) + 163 <sup>a</sup> + 164 <sup>a</sup> |
| 1. <i>PalcA-nanA_AfpyrG</i><br>2. <i>PalcA-nanC_PalcS-nanF_PalcM-nanB_PaldA-nanD_AfriboB</i>                                 | NanA – D/F        | 165                                                                         |
| 1. <i>PalcA-nanA_AfpyrG</i><br>2. <i>PalcA-nanC_PalcS-nanF_PalcM-nanB_PaldA-nanD_AfriboB</i><br>3. <i>PalcA-nanE_AfpyroA</i> | NanA – F          | 158 + 159 (trace) + 160 (trace) + 161 (trace) + 162 (trace)                 |

<sup>a</sup>: Purification and characterization of the compound was unsuccessful.



**Table S21.** Vectors used for *buA* expression used and their corresponding chemical products.

| Expression cassettes                                                                                                                  | Enzymes expressed | Products        |
|---------------------------------------------------------------------------------------------------------------------------------------|-------------------|-----------------|
| 1. <i>PalcA-buA_AfpyrG</i><br>2. <i>PalcA-buAC_AfriboB</i>                                                                            | BuA/C             | no product      |
| 1. <i>PalcA-buA_AfpyrG</i><br>2. <i>PalcA-buAC_PalcS-buAE_AfriboB</i>                                                                 | BuA/C/E           | no product      |
| 1. <i>PalcA-buA_AfpyrG</i><br>2. <i>PalcA-buAC_PalcS-buAE_PaldA-buAG_AfriboB</i><br>3. <i>PalcA-buAB_PaldA-buAF_AfpyroA</i>           | BuA – C/E/F/G     | 168 + 170 + 171 |
| 1. <i>PalcA-buA_AfpyrG</i><br>2. <i>PalcA-buAC_PalcS-buAE_PaldA-buAG_AfriboB</i><br>3. <i>PalcA-buAB_PalcS-buD_PaldA-buAF_AfpyroA</i> | BuA – G           | 168 + 170 + 171 |

**Table S22.** Different combinations of *Ateafo* genes and their corresponding chemical products.

| Expression cassettes                                                                                      | Enzymes expressed | Products                                                                                                         |
|-----------------------------------------------------------------------------------------------------------|-------------------|------------------------------------------------------------------------------------------------------------------|
| <i>AfpyrG_PalCA-AteafoG_PalCA-AteafoE_AfpyroA</i>                                                         | AteAfoE/G         | <b>174</b> (~ 95 mg/L) + <b>177</b> (trace) + <b>178</b> (trace) + <b>179</b> (trace) + <b>180</b> (trace)       |
| <i>AfpyrG_PalCA-AteafoG_PalCA-AteafoE_PalCA-AteafoF_AfriboB</i>                                           | AteAfoE/F/G       | <b>174</b> (~ 95 mg/L) + <b>177</b> (trace) + <b>178</b> (trace) + <b>179</b> (trace) + <b>180</b> (trace)       |
| <i>AfpyrG_PalCA-AteafoG_PalCA-AteafoE_PalCA-AteafoD_AfriboB</i>                                           | AteAfoD/E/G       | <b>179</b> (trace) + <b>175</b> + <b>176</b> (trace) + <b>180</b> (trace) + <b>181</b> (trace)                   |
| <i>AfpyrG_PalCA-AteafoG_PalCA-AteafoE_PalCA-AteafoC_AfriboB</i>                                           | AteAfoC/E/G       | <b>174</b> (~ 300 mg/L) + <b>177</b> + <b>178</b> + <b>179</b> (trace) + <b>180</b> (trace) + <b>181</b> (trace) |
| <i>AfpyrG_PalCA-AteafoG_PalCA-AteafoC_AfpyroA</i>                                                         | AteAfoC/G         | <b>179</b> (~ 1 mg/L)                                                                                            |
| <i>AfpyrG_PalCA-AteafoG_PalCA-AteafoE_PalCA-AteafoC_PalCA-AteafoD_AfpyroA</i>                             | AteAfoC/D/E/G     | <b>179</b> (trace) + <b>175</b> + <b>176</b> + <b>180</b> (trace) + <b>181</b> (trace)                           |
| <i>AfpyrG_PalCA-AteafoG_PalCA-AteafoE_PalCA-AteafoC_PalCA-AteafoD_PalCA-AteafoC_AfriboB</i>               | AteAfoC/D/E/G     | <b>179</b> (~2 mg/L) + <b>175</b> (~10 mg/L) + <b>17</b> (~6 mg/L) + <b>180</b> (~3 mg/L) + <b>181</b> (~1 mg/L) |
| <i>AfpyrG_PalCA-AteafoG_PalCA-AteafoE_PalCA-AteafoC_PalCA-AteafoD_PalCA-AteafoF_AfriboB</i>               | AteAfoC – G       | <b>173</b> + <b>179</b> (trace) + <b>175</b> + <b>176</b> (trace) + <b>181</b> (trace)                           |
| <i>AfpyrG_PalCA-AteafoG_PalCA-AteafoE_PalCA-AteafoF_PalCA-AteafoD_PalCA-AteafoC_AfriboB</i>               | AteAfoC – G       | <b>173</b> + <b>179</b> (trace) + <b>175</b> + <b>176</b> (trace) + <b>181</b> (trace)                           |
| <i>AfpyrG_PalCA-AteafoG_PalCA-AteafoE_PalCA-AteafoF_PalCA-AteafoC_PalCA-AteafoD_AfriboB</i>               | AteAfoC – G       | <b>173</b> + <b>179</b> (trace) + <b>175</b> + <b>176</b> (trace) + <b>181</b> (trace)                           |
| <i>AfpyrG_PalCA-AteafoG_PalCA-AteafoE_PalCA-AteafoF_PalCA-AteafoD_PalCA-AteafoC_PalCA-AteafoB_AfpyroA</i> | AteAfoB – G       | <b>173</b> + <b>179</b> (trace) + <b>175</b> + <b>176</b> (trace) + <b>181</b> (trace)                           |

**Table S23.** Different combinations of *ctv* genes and their corresponding chemical products.

| Expression cassettes                                               | Enzymes expressed | Products                      |
|--------------------------------------------------------------------|-------------------|-------------------------------|
| <i>AfriboB_PalcA-ctvA_AfpyrG</i>                                   | CtvA              | <b>185</b> (~10 mg/L)         |
| <i>AfriboB_PalcA-ctvA_PalcA-ctvB_AfpyroA</i>                       | CtvA/B            | <b>186</b> (~5 mg/L)          |
| <i>AfriboB_PalcA-ctvA_PalcA-ctvC_AfpyroA</i>                       | CtvA/C            | <b>185</b> (~10 mg/L)         |
| <i>AfriboB_PalcA-ctvA_PalcA-ctvB_PalcA-ctvC_AfpyrG</i>             | CtvA – C          | <b>184</b> (trace) + unknowns |
| <i>AfriboB_PalcA-ctvA_PalcA-ctvB_PalcA-ctvC_PalcA-ctvD_AfpyroA</i> | CtvA – D          | <b>184</b> (~3 mg/L)          |
